# Supplementary material for: Contribution of the Collagen-Binding Proteins of Streptococcus mutans to Bacterial Colonization of Inflamed Dental Pulp
Source: PubMed Central journal article supplement (PMC4956251; doi:10.1371/journal.pone.0159613), 2016-07-21
Supplement: pone.0159613.s002.pdf [file pone.0159613.s002.pdf]

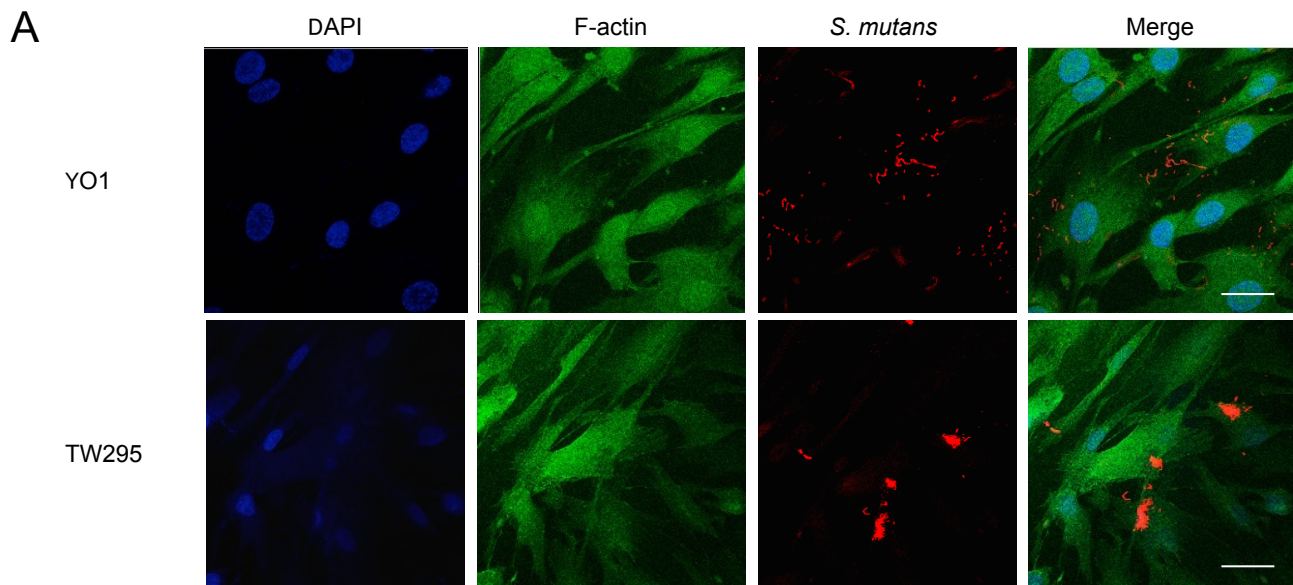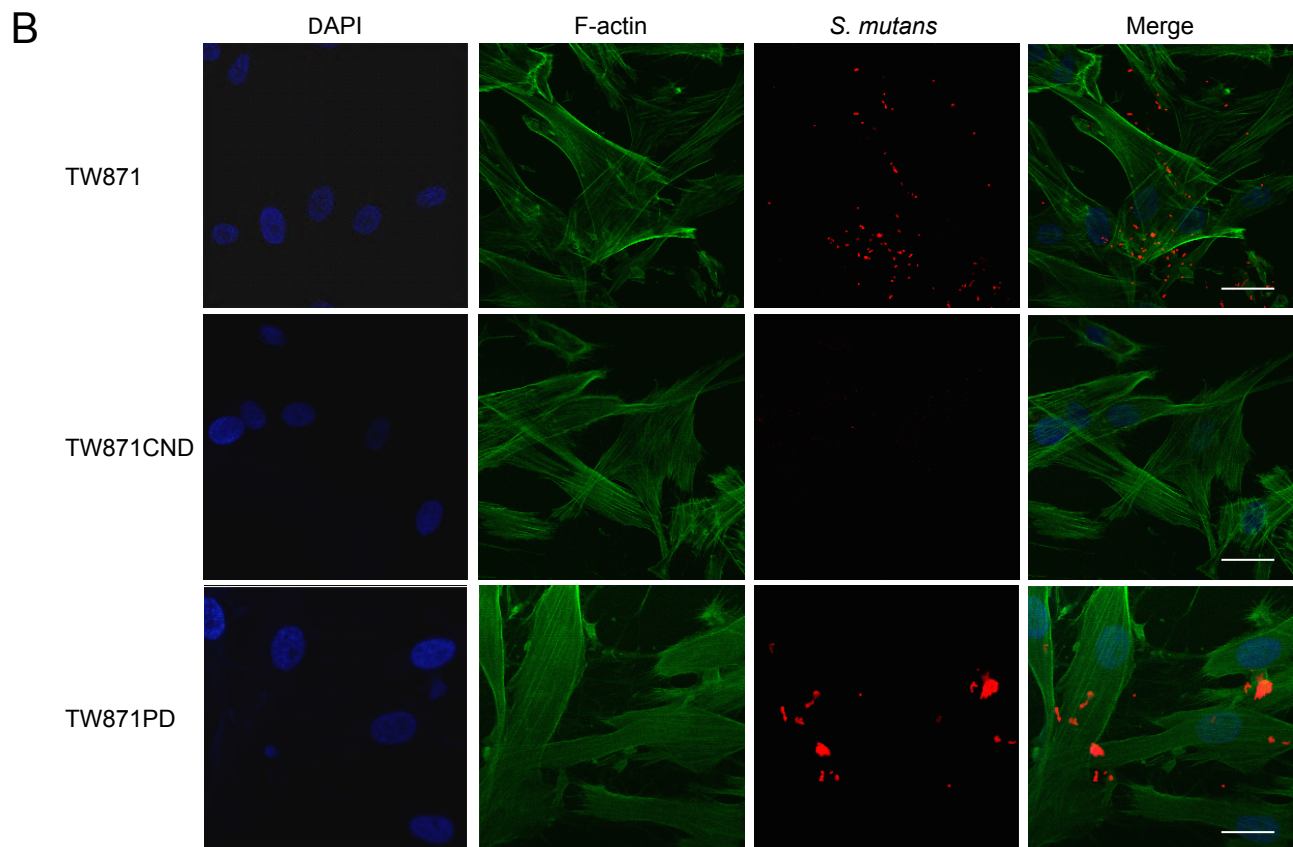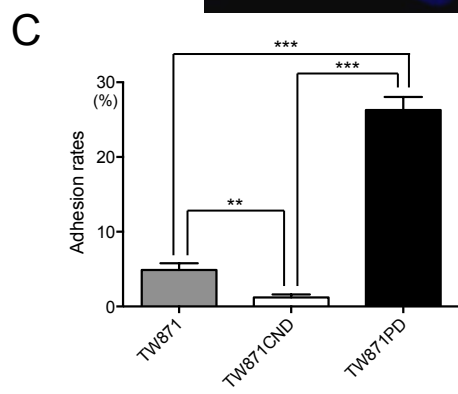

**S2 Fig**
